1 ***In situ* activation and heterologous production of a cryptic lantibiotic from a**  
2 **plant-ant derived *Saccharopolyspora* species**

3

4 Eleni Vikeli,<sup>1,2#</sup> David A. Widdick,<sup>1#</sup> Sibyl F. Batey,<sup>1#</sup> Daniel Heine,<sup>1</sup> Neil A. Holmes,<sup>2</sup>  
5 Mervyn J. Bibb,<sup>1</sup> Dino J. Martins,<sup>3,4</sup> Naomi E. Pierce,<sup>3</sup> Matthew I. Hutchings<sup>2\*</sup> and  
6 Barrie Wilkinson<sup>1\*</sup>

7

8 <sup>1</sup>Department of Molecular Microbiology, John Innes Centre, Norwich Research Park,  
9 Norwich NR4 7UH, UK

10 <sup>2</sup>School of Biological Sciences, University of East Anglia, Norwich NR4 7TJ, UK

11 <sup>3</sup>Department of Organismic and Evolutionary Biology, Harvard University, Cambridge  
12 MA 02138, USA

13 <sup>4</sup>Mpala Research Centre, P O Box 555, Nanyuki, 10400 Kenya

14

15 \*Address correspondence to Barrie Wilkinson ([barrie.wilkinson@jic.ac.uk](mailto:barrie.wilkinson@jic.ac.uk)) and  
16 Matthew I. Hutchings ([m.hutchings@uea.ac.uk](mailto:m.hutchings@uea.ac.uk)). #These authors contributed equally  
17 to this work

18

19 **Abstract.** Most clinical antibiotics are derived from actinomycete natural products  
20 (NPs) discovered at least 60 years ago. Repeated rediscovery of known compounds  
21 led the pharmaceutical industry to largely discard microbial NPs as a source of new  
22 chemical diversity but advances in genome sequencing revealed that these organisms  
23 have the potential to make many more NPs than previously thought. Approaches to  
24 unlock NP biosynthesis by genetic manipulation of the strain, by the application of  
25 chemical genetics, or by microbial co-cultivation have resulted in the identification of  
26 new antibacterial compounds. Concomitantly, intensive exploration of coevolved  
27 ecological niches, such as insect-microbe defensive symbioses, has revealed these  
28 to be a rich source of chemical novelty. Here we report the novel lanthipeptide  
29 antibiotic kyamicin generated through the activation of a cryptic biosynthetic gene

30 cluster identified by genome mining *Saccharopolyspora* species found in the obligate  
31 domatia-dwelling ant *Tetraoponera penzigi* of the ant plant *Vachellia drepanolobium*.  
32 Heterologous production and purification of kyamicin allowed its structural  
33 characterisation and bioactivity determination. Our activation strategy was also  
34 successful for the expression of lantibiotics from other genera, paving the way for a  
35 synthetic heterologous expression platform for the discovery of lanthipeptides that are  
36 not detected under laboratory conditions or that are new to nature.

37

38 **Importance.** The discovery of novel antibiotics to tackle the growing threat of  
39 antimicrobial resistance is impeded by difficulties in accessing the full biosynthetic  
40 potential of microorganisms. The development of new tools to unlock the biosynthesis  
41 of cryptic bacterial natural products will greatly increase the repertoire of natural  
42 product scaffolds. Here we report an activation strategy that can be rapidly applied to  
43 activate the biosynthesis of cryptic lanthipeptide biosynthetic gene clusters. This  
44 allowed the discovery of a new lanthipeptide antibiotic directly from the native host and  
45 via heterologous expression.

46

47 Antimicrobial resistance (AMR) is arguably the greatest health threat facing humanity  
48 in the 21<sup>st</sup> century (1-3). It is predicted that without urgent action, infectious disease  
49 will become the biggest killer of humans by 2050 (1). The majority of clinically used  
50 antibiotics are based on microbial natural products, isolated mostly from soil-dwelling  
51 *Streptomyces* species and other filamentous actinomycete bacteria, and these  
52 organisms remain a promising source of new antibiotics. Although the discovery  
53 pipeline began to dry up in the 1960s, blighted by the rediscovery of known  
54 compounds, we know from large scale genome sequencing that up to 90% of microbial  
55 natural products are not produced under laboratory conditions (4). Thus, there exists  
56 a wealth of novel chemistry waiting to be discovered by mining the genomes of these  
57 organisms. Bearing in mind that >600 *Streptomyces* species and many other so called  
58 ‘rare’ actinomycetes have been described, thousands of potentially useful but “cryptic”  
59 bioactive compounds are waiting to be discovered, even from well-characterised  
60 strains (5,6). Several approaches have been taken to activate cryptic pathways  
61 including the heterologous expression of entire biosynthetic gene clusters (BGCs) in  
62 optimised *Streptomyces* host strains, and rewiring BGCs to bypass their natural  
63 regulatory mechanisms (7). The knowledge that we have barely sampled the  
64 biosynthetic capabilities of known strains, and that even well explored environments  
65 such as soil have been under sampled for antibiotic-producing microbes, provides a  
66 much-needed opportunity for the development of new natural product-based  
67 antibiotics.

68 Searching symbiotic niches for new actinomycete strains also shows great promise  
69 for discovering new natural products (8-11). We previously described the  
70 formicamycins, new polyketides with potent Gram-positive antibacterial activity  
71 produced by a new *Streptomyces* species that we named *Streptomyces formicae* KY5  
72 (12). This species was isolated from a phytoecioius ant species, *Tetraoponera penzigi*,  
73 whose colonies inhabit the African ant plant *Vachellia (=Acacia) drepanolobium*. The  
74 ants were collected in Kenya, hence the KY strain designation (13). These ants live in  
75 symbiosis with their host plants, the “whistling thorn acacias”, that have evolved  
76 specialised hollow, stipular thorns called domatia to house the ants (14). In return for  
77 housing, plant ants protect their hosts against attack by large herbivores, including  
78 elephants (15), and recent reports have suggested that they grow specialized fungal  
79 communities inside their domatia, possibly as a food source for their larvae (16,17).

80 The external, cuticular microbiome of *T. penzigi* ants is heterogeneous, and unbiased  
81 methods have shown this is dominated by members of the phyla Proteobacteria and  
82 Firmicutes, with Actinobacteria forming a minor component (13). This contrasts with  
83 the better studied fungus-farming leafcutter ants of the tribe Attini, which are  
84 dominated by actinobacteria, specifically by a single strain of *Pseudonocardia* that can  
85 be vertically transmitted by the new queens (18,19). Leafcutter ants feed cut plant  
86 material to their symbiotic food fungus *Leucoagaricus gongylophorus* and use  
87 antifungals made by their *Pseudonocardia* symbionts to defend their food fungus  
88 against fungal parasites in the genus *Escovopsis* (20-22). Despite the low abundance  
89 of actinobacteria, we isolated several strains, including three from the rare  
90 actinomycete genus *Saccharopolyspora*, which, despite the modest number of  
91 described species, is the origin of the medically and agriculturally important natural  
92 products erythromycin and spinosyn.

93 Genome mining of these *Saccharopolyspora* strains identified a conserved BGC  
94 encoding a putative cinnamycin-like lanthipeptide antibiotic (lantibiotic) (23), although  
95 no products for this BGC could be identified from the wild-type isolates. Cinnamycin is  
96 a class II type B lantibiotic produced by *Streptomyces cinnamoneus* DSM 40005 which  
97 destabilises the cytoplasmic membrane by binding phosphatidylethanolamine (PE)  
98 (23-25). Lanthipeptides belong to the ribosomally synthesised and post-translationally  
99 modified peptide (RiPP) family of natural products (26,27), and cinnamycin is the  
100 founding member of a sub-group of lanthipeptide RiPPs with antibacterial activity that  
101 includes cinnamycin B (28), duramycin (29), duramycin B and C (30), and  
102 mathermycin (31) (Fig. 1A). These molecules are produced by actinomycetes and  
103 comprise 19 amino acid residues, several of which are modified to generate  
104 lanthionine or methyllanthionine cross-links (26,27). Additional modifications include  
105  $\beta$ -hydroxylation of the invariant aspartic acid residue at position 15 and formation of  
106 an unusual lysinoalanine cross-link between the serine residue at position 6 and lysine  
107 residue at position 19 (32-34). The interaction of these molecules with PE has  
108 therapeutic potential: duramycin binds to human lung epithelial cell membranes  
109 leading to changes in the membrane, or its components, promoting chloride ion  
110 secretion and clearance of mucus from the lungs (25). On this basis, duramycin  
111 entered Phase II clinical trials for the treatment of cystic fibrosis (35).

112 Here we describe activation of the cryptic *Saccharopolyspora* lanthipeptide BGCs and  
113 the characterization of their product, a new class II lantibiotic that we called kyamicin.  
114 We also exemplify a heterologous expression platform for lanthipeptide production that  
115 may be particularly useful for strains that are refractory to genetic manipulation. The  
116 methodologies reported should be applicable for the activation of cryptic BGCs from a  
117 wide range of actinomycetes.

118

## 119 **RESULTS**

### 120 **Origin, characteristics and genome sequencing of *Saccharopolyspora* strains.**

121 The *Saccharopolyspora* strains were isolated from ants taken from the domatia of *T.*  
122 *penzigi* plant ants collected in two locations in Kenya (13), and named KY3, KY7 and  
123 KY21. 16S rDNA was amplified and Sanger sequenced using the universal primers  
124 533F and 1492R (Genbank accession numbers JX306001, JX306003, JX306004,  
125 respectively). Alignments show that KY3 and KY7 are identical across the sequenced  
126 16S rDNA region while KY21 differs by a single base pair (Fig. S1). Further analysis  
127 showed that all three strains share 99% sequence identity with *Saccharopolyspora*  
128 16S rDNA sequences in public databases. High molecular weight genomic DNA was  
129 isolated from each strain, sequenced at the Earlham Institute (Norwich, UK) using  
130 SMRT sequencing technology (Pacific Biosciences RSII platform) and assembled  
131 using the HGAP2 pipeline as described previously (36). This gave three circular  
132 chromosomes of approx. 6.33 Mbp, the full analysis of which will be reported  
133 separately. Alignment of the KY3 and KY7 genome sequences using RAST SEED  
134 Viewer and BLAST dot plot revealed a full synteny along their genomes with 99-100%  
135 sequence identity at the nucleotide level suggesting KY3 and KY7 are the same strain  
136 and different to KY21.

137

138 **Identification of a conserved cinnamycin-like BGC.** The biosynthetic potential of  
139 all three strains was probed using the genome mining platform antiSMASH (37). The  
140 three genomes each encode approximately 25 BGCs with significant overlap.  
141 Amongst these was a BGC for a cinnamycin-like lanthipeptide. The BGC architecture  
142 was conserved across all three genomes, including an identical pro-peptide sequence  
143 encoded by the precursor peptide gene, suggesting they all encode the same

144 molecule which we named kyamicin (Fig. 1B). The sequence and annotations for  
145 these three BGCs have been deposited at GenBank under the accession numbers  
146 MK251551 (KY3), MK251552 (KY7) and MK251553 (KY21).

147 Through comparison to the cinnamycin BGC (24), and cinnamycin biosynthesis (32),  
148 we assigned roles to each of the genes in the kyamicin (*kya*) BGC (Table 1). The *kya*  
149 BGC is more compact than that for cinnamycin, and the genes missing from the  
150 kyamicin BGC are dispensable for cinnamycin production (38). The *cinorf11* gene is  
151 not required for cinnamycin production but a homologue is present in the kyamicin  
152 cluster. While *cinorf11* lacks a plausible stop codon and its reading frame extends 570  
153 bp into the *cinR1* gene, its homologue, *kyaorf11*, has a stop codon and does not run  
154 into the *kyaR1* gene suggesting it may encode a functional protein.

155 To detect production of kyamicin we grew all three strains on a range of 13 liquid media  
156 (Table S2) and extracted after four, five, six and seven days of growth, using  
157 (individually) methanol and ethyl acetate. Analysis of the extracts using UPLC/MS  
158 failed to identify the anticipated product (the methods were validated using authentic  
159 duramycin). This was consistent with parallel bioassays which failed to show any  
160 antibacterial activity for the extracts against *Bacillus subtilis* EC1524, which is sensitive  
161 to cinnamycin (24). Similarly, no activity was observed in overlay bioassays.

162 **Activation of the kyamicin BGC.** Cinnamycin production and self-immunity  
163 ultimately rely on two gene products (38). The transcription of the biosynthetic genes  
164 is driven by CinR1, a SARP (*Streptomyces* Antibiotic Regulatory Protein, which usually  
165 act as pathway specific transcription activators), and self-immunity is conferred by a  
166 methyl transferase (Cinorf10) that modifies PE in the membrane to prevent binding of  
167 cinnamycin. We reasoned that transcription of the homologues of these two genes  
168 (*kyaR1* and *kyaL*, respectively), driven by a constitutive promoter, would circumvent  
169 the natural regulatory mechanism and initiate production of kyamicin. To achieve this,  
170 we made a synthetic construct, pEVK1, containing *kyaR1-kyaL* (in that order), with a  
171 *NdeI* site overlapping the start codon of *kyaR1*, a *HindIII* site after the stop codon of  
172 the *kyaL* and with the *kyaN* ribosome binding site (RBS) located between the two  
173 genes (the *kyaN* RBS was chosen as its sequence is most similar in the BGC to that  
174 of an ideal RBS) (Fig. S2A). The *kyaR1-kyaL* cassette was cloned into pGP9 (39) to  
175 yield pEVK4 which was introduced into the three *Saccharopolyspora* strains by

176 conjugation. This resulted in single copies of the plasmid integrated at the  $\phi$ BT1 phage  
177 integration site of each strain. Exconjugants were assayed by overlaying with *B.*  
178 *subtilis* EC1524, revealing zones of clearing for all three strains containing pEVK4 (Fig.  
179 2A, Fig. S3). For the KY21 ex-conjugant, agar plugs were taken from the zone of  
180 clearing, extracted with 5% formic acid and analysed by UPLC/MS (Fig. 2A). In  
181 contrast to the relevant controls, an ion at  $m/z$  899.36 was observed corresponding to  
182 the expected  $[M + 2H]^{2+}$  ion of kyamicin (Table 2).

183 **Heterologous expression of the kyamicin BGC.** Attempts to scale up cultures of  
184 *Saccharopolyspora* sp. KY21/pEVK4 to generate sufficient material for further study  
185 were not successful. Consequently, we attempted heterologous expression of the *kya*  
186 BGC in the well-established host *Streptomyces coelicolor* M1152 (40). To achieve this,  
187 we cloned *kyaR1L* as a *NdeI/HindIII* fragment into pIJ10257, a  $\phi$ BT1-based integrative  
188 expression vector with a hygromycin resistance marker (41); this yielded pEVK6,  
189 which has the constitutive *ermE\** promoter driving expression of *kyaR1L*. We then  
190 commissioned a synthetic operon containing *kyaN-H* plus the upstream promoter  
191 region of *kyaN* as an *EcoRI/XbaI* fragment (Fig. S2B). This was cloned into pSET152  
192 (42) to give pWDW63, which integrates into the *S. coelicolor* chromosome at the  $\phi$ C31  
193 integration site, conferring apramycin resistance. pEVK6 and pWDW63 were then  
194 introduced sequentially into *S. coelicolor* M1152 *via* conjugation, and apramycin plus  
195 hygromycin resistant ex-conjugants were grown on R5 agar and overlaid with *B.*  
196 *subtilis* EC1524. In contrast to the control strains, these gave a pronounced zone of  
197 clearing. Agar plugs were taken from the zone of clearing, extracted and analysed by  
198 UPLC/MS, revealing the expected  $[M + 2H]^{2+}$  ion for kyamicin which was not present  
199 in the controls (Fig. 2B). In addition to kyamicin, a second minor new compound was  
200 observed with an  $m/z$  value of 891.36, consistent with the production of a small amount  
201 of deoxykyamicin presumably reflecting incomplete  $\beta$ -hydroxylation of the aspartic  
202 acid residue at position 15 (Table 2 and Fig. S4).

203 Having established the production of kyamicin in the M1152 heterologous host, we  
204 used this system to better understand how each gene product contributes to the  
205 activation of kyamicin biosynthesis. We cloned *kyaL* and *kyaR1* separately into  
206 pIJ10257, to give pEVK12 and pEVK13, respectively. Each plasmid was then  
207 introduced into M1152 alongside pWDW63, and doubly antibiotic resistant ex-  
208 conjugants were selected. These were grown on R5 agar plates and overlaid with *B.*

209 *subtilis* EC1524; agar plugs were extracted from the resulting bioassay plates as  
210 before. For M1152/pEVK12 (*kyaL* only) no growth inhibition of the bioassay strain was  
211 observed and we could not detect kyamicin or deoxykyamicin using UPLC/MS. For  
212 M1152/pEVK13 (*kyaR1* only), we observed a zone of inhibition which was  
213 approximately three times smaller than for the M1152/pEVK6 (*kyaR1L*) positive  
214 control. UPLC/MS analysis of the M1152/pEVK13 strain detected only deoxykyamicin  
215 (Fig. S4). This is consistent with previous work which reported that deoxy versions of  
216 lantibiotics have lower biological activity (43).

217 **Isolation, structure elucidation and bioactivity.** To isolate and verify the structure  
218 of kyamicin, growth of *S. coelicolor* M1152/pEVK6/pWDW63 was scaled up in liquid  
219 culture and the cell pellet extracted with 50% methanol. Crude extracts were further  
220 purified using semi-preparative HPLC to yield pure kyamicin (2.5 mg).

221 As the methyllanthionine bridges of kyamicin limit the ability to induce fragmentation  
222 in MS/MS experiments, the lantibiotic was subjected to chemical reduction with  
223 NaBH<sub>4</sub>-NiCl<sub>2</sub> using a procedure published previously for the related molecule  
224 cinnamycin B (28). This leads to removal of the methyllanthionine bridges and, as  
225 anticipated, UPLC/MS of the product molecule showed an [M + 2H]<sup>2+</sup> ion at *m/z* 854.42  
226 corresponding to the loss of three sulfur atoms and gain of six hydrogen atoms (Table  
227 2 and Fig. 3). Tandem MS experiments were carried out using both ESI and MALDI-  
228 ToF methods. Whilst ESI gave a complex mixture of fragmentation ions, for MALDI-  
229 ToF the *y* ion (NH<sub>3</sub><sup>+</sup>) series could be clearly observed, with fragmentation at the  
230 lysinoalanine bridge appearing to occur via a rearrangement to give a glycine residue  
231 at position 6 and N=CH<sub>2</sub> at the end of the lysine side chain (Fig. S5). The connectivity  
232 of the peptide was consistent with the primary sequence of kyamicin predicted by our  
233 bioinformatics analysis.

234 The chemical structure was further examined by NMR experiments comprising <sup>1</sup>H,  
235 HSQC, TOCSY and NOESY analyses. Overall, 14 spin systems could be partially or  
236 completely identified in the TOCSY spectrum. These could be putatively assigned  
237 based on their spatial relationship determined from the NOESY spectrum. Coupling in  
238 the HSQC spectrum then allowed identification of several C atoms in the molecule.  
239 Spectra and assignments can be found in Fig. S6 and Table S3.



240 The bioactivity of the purified compound was compared with cinnamycin and  
241 duramycin using the spot-on-lawn method. The minimum inhibitory concentration  
242 (MIC) of kyamicin against *B. subtilis* EC1524 was 128 µg/mL, whereas duramycin  
243 inhibited at 32 µg/mL and cinnamycin at 16 µg/mL, representing a 4 and 8-fold MIC  
244 increase respectively (Fig. 4).

245 **Cross species activation of the duramycin BGC.** Many cinnamycin-like BGCs can  
246 be identified in the published sequence databases, but their products remain cryptic.  
247 Thus, the potential of the *kyaR1-kyaL* construct to induce expression of other  
248 cinnamycin-like lantibiotics was explored.

249 The BGC for duramycin was cloned previously from *Streptomyces cinnamoneus*  
250 ATCC 12686 (Fig. S7A) but attempts to produce the lantibiotic heterologously failed.  
251 Consequently, the duramycin BGC was reconfigured in pOJKKH, which contains all  
252 the biosynthetic genes, but lacks immunity and regulatory genes, and has a SARP  
253 binding site upstream of *durN* that is similar to that upstream of *kyaN* (Fig. S7B) (38).  
254 pOJKKH and pEVK6 were introduced sequentially into *S. coelicolor* M1152 *via*  
255 conjugation and the resulting ex-conjugants assessed for duramycin production.  
256 Overlay bioassays using *B. subtilis* EC1524 indicated the production of an antibacterial  
257 molecule by *S. coelicolor* M1152/pOJKKH/pEVK6 (Fig. 5). Agar within the growth  
258 inhibition zone was extracted and the resulting sample analysed by UPLC/MS. An ion  
259 at *m/z* 1006.92 was observed, corresponding to the expected  $[M + 2H]^{2+}$  ion for  
260 duramycin (Table 2). The production of duramycin was confirmed by comparison to  
261 an authentic standard. A deoxy derivative was also detected with an *m/z* of 998.93  
262 (Table 2), typically at ~30% the level of duramycin. Expression of pOJKKH alone or in  
263 conjunction with the empty pIJ10257 vector did not result in duramycin biosynthesis,  
264 demonstrating that expression of both *kyaR1* and *kyaL* are required to induce  
265 heterologous duramycin biosynthesis in *S. coelicolor* M1152. Thus, we have shown  
266 that the SARP and resistance genes from a cinnamycin-like BGC from a  
267 *Saccharopolyspora* species can be used to activate a cinnamycin-like BGC from a  
268 *Streptomyces* species, a cross genus activation.

269

270

271

## 272 DISCUSSION

273 Three isolates from the relatively rare actinomycete genus *Saccharopolyspora* were  
274 isolated from the external microbiome of *T. penzigi* plant ants collected at two locations  
275 in Kenya more than 50 km apart (13). Despite this geographical separation, their  
276 genomes were extremely similar and analysis using antiSMASH identified almost  
277 identical biosynthetic capabilities. Amongst the conserved BGCs was one encoding a  
278 cinnamycin-like lantibiotic which we named kyamicin.

279 Despite culturing on a wide range of media, we were unable to elicit production of  
280 kyamicin in the wild-type *Saccharopolyspora* strains. The production of cinnamycin in  
281 *S. cinnamoneus* DSM 40005 requires the expression of two key genes, *cinR1* and  
282 *cinorf10*, encoding a pathway specific regulatory gene (a SARP) and a self-immunity  
283 gene (a PE methyltransferase), respectively (38). As the *kya* BGC encodes  
284 homologues of these genes, we expressed them constitutively in the three  
285 *Saccharopolyspora* strains which led to activation of the BGC and production of  
286 kyamicin. Since we were unable to isolate enough kyamicin from these strains for  
287 further study, a heterologous production platform was developed using *S. coelicolor*  
288 M1152 which allowed us to confirm the structure of kyamicin and assess its  
289 antibacterial activity.

290 Having demonstrated the utility of a constitutively expressed SARP/self-immunity  
291 cassette for driving expression of the otherwise silent *kya* BGC we utilised this  
292 knowledge to activate duramycin production in a heterologous host.  
293 Contemporaneous with our experiments, the duramycin BGC was also identified by  
294 genome sequencing of *S. cinnamoneus* ATCC 12686 (33). This analysis described  
295 the same genomic region containing *durN* to *durH* and surrounding genes (Table 1)  
296 but failed to reveal putative regulatory and immunity genes. Co-expression of *durA*,  
297 *durM*, *durN* and *durX* in *E. coli* was sufficient to direct the biosynthesis of duramycin  
298 A, and the functions of DurA, DurM, DurN and DurX were confirmed by detailed  
299 biochemical analyses. Our subsequent bioinformatic analysis of the published  
300 genome sequence identified homologs of the resistance genes *cinorf10/kyaL* and the  
301 regulatory genes *cinRKR1/kyaRKR1* in region 54637 to 59121 bp of contig  
302 MOEP01000113.1 from the deposited genome sequence (accession no.  
303 NZ\_MOEP00000000). This region is separated from the *dur* biosynthetic genes by a

304 section of low mol %GC DNA, the analysis of which suggests that a phage or other  
305 mobile element may have inserted between *durZ* and *durorf8* (Fig. S7). Thus, it  
306 appears likely that the immunity and regulatory mechanisms described previously for  
307 the control of cinnamycin biosynthesis are conserved for duramycin biosynthesis in *S.*  
308 *cinnamoneus* ATCC 12686.

309 Given the potential utility of cinnamycin-like class II lanthipeptides in several  
310 therapeutic contexts, the ability to generate analogues of these compounds with  
311 modified properties and in sufficient quantity for preclinical assessment is of significant  
312 value. The methods described here provide a platform for the identification of  
313 additional natural lanthipeptides whose biosynthesis cannot be detected in the host  
314 strain, and for the diversification of their chemical structures to generate new-to-nature  
315 molecules.

316

## 317 **MATERIALS AND METHODS**

318 **Bacterial strains, plasmids and growth conditions.** All bacterial strains and  
319 plasmids used in this study are listed in Table S1 in the supplemental material.  
320 *Saccharopolyspora* and *Streptomyces* strains were grown on soya flour mannitol  
321 (SFM) agar medium with appropriate antibiotics at 30 °C unless otherwise stated. *E.*  
322 *coli* and *B. subtilis* EC1524 strains were grown on lysogeny broth (LB) medium with  
323 appropriate antibiotics at 37 °C. R5 agar (44) was used for bioassay plates.

324 **DNA extraction and genomic analysis.** The salting out method (44) was used to  
325 extract genomic DNA. The DNA was sequenced at the Earlham Institute (Norwich,  
326 UK) using SMRT sequencing technology (Pacific Biosciences RSII platform) and  
327 assembled using the HGAP2 pipeline (36).

328 **Overlay bioassays.** For each strain to be tested, a streak from a spore stock was  
329 applied in the centre of an R5 agar plate and left to grow for seven days. *B. subtilis*  
330 EC1524 was grown from a single colony overnight, then diluted 1:20 in fresh media  
331 and grown until OD<sub>600</sub> = 0.4 - 0.6. The exponential culture was mixed with 1:100 molten  
332 soft nutrient agar (SNA) (44) and the mixture was used to overlay the plate (5 mL SNA  
333 mixture/agar plate). The plate was incubated at room temperature overnight.

334 **Extractions from overlay bioassays.** Plugs of agar 6.35 mm in diameter were taken  
335 adjacent to the streaked actinomycete strain on an overlay bioassay plate,  
336 corresponding to the zone of growth inhibition where one was observed. Agar plugs  
337 were frozen at -80 °C for 10 min, thawed and then 300 µL of 5% formic acid was  
338 added. This was vortexed briefly and shaken for 20 min. After centrifugation (15,682  
339 × *g* for 15 min) the supernatant was collected and filtered using a filter vial (HSTL  
340 Labs) prior to UPLC-MS analysis.

341 **UPLC-HRMS.** Data were acquired with an Acquity UPLC system (Waters) equipped  
342 with an Acquity UPLC® BEH C18 column, 1.7 µm, 1x100 mm (Waters) connected to  
343 a Synapt G2-Si high-resolution mass spectrometer (Waters). For analytical UPLC 5.0  
344 µL of each sample was injected and eluted with mobile phases A (water/0.1% formic  
345 acid) and B (acetonitrile/0.1% formic acid) at a flow rate of 80 µL/min. Initial conditions  
346 were 1% B for 1.0 min, ramped to 40 % B within 9.0 min, ramped to 99 % B within  
347 1.0 min, held for 2 min, returned to 1 % B within 0.1 min and held for 4.9 min.

348 MS spectra were acquired with a scan time of 1.0 s in the range of *m/z* = 50 - 2000 in  
349 positive resolution mode. The following parameters were used: capillary voltage of 3.0  
350 kV, cone voltage 40 V, source offset 80 V, source temperature 130 °C, desolvation  
351 temperature 350 °C, desolvation gas flow of 700 L/h. A solution of sodium formate was  
352 used for calibration. Leucine enkephalin peptide (H<sub>2</sub>O/MeOH/formic acid:  
353 49.95/49.95/0.1) was used as lock mass (556.2766 *m/z*) and was injected every 30 s  
354 during each run. The lock mass correction was applied during data analysis.

355 **Design of *kya* BGC activation and immunity plasmids.** pEVK1, a pUC57 derivative,  
356 contains the synthetic *kyaR1* and *kyaL* (Genscript) arranged as an operon. pEKV1 has  
357 a *NdeI* site overlapping the start codon of *kyaR1* and a *HindIII* site immediately after  
358 the stop codon of *kyaL* with the two genes separated by a short intergenic region  
359 containing a RBS designed from the RBS of *cinN* (Fig. S2A). The *NdeI-HindIII kyaR1L*  
360 fragment from pEVK1 was cloned in pGP9 (39) to give pEVK4, and into pJ10257 (41)  
361 to give pEKV6. *kyaR1* and *kyaL* were amplified individually as *NdeI-HindIII* compatible  
362 fragments using the primers AmplkyaR1-F  
363 (GCGCAAGCTTCTACGACGCGGTGTGA) and AmplkyaR1-R  
364 (GCGCGCCATATGAAACCGCTGTCGTTCC) for *kyaR1*, and AmplkyaL-F  
365 (GCGCGCCATATGGATCCAGTACAGACCA) and AmplkyaL-R

366 (GCGCAAGCTTTCAGCGGTCCTCCGCC) for *kyaL*; they were cloned as *NdeI-HindIII*  
367 fragments into pJ10257 to yield pEVK12 and pEVK13 respectively. PCR generated  
368 fragments were verified by Sanger sequencing.

369 **Cloning the duramycin BGC from *Streptomyces cinnamoneus* ATCC 12686.** The  
370 cloning of a ~5 Kb *BglII* fragment of chromosomal DNA to create pJ10100 was  
371 described previously (24). This plasmid has a *KpnI* site in the middle of *durX*. *KpnI*  
372 fragments upstream and downstream of this *KpnI* site were identified by Southern  
373 blotting and isolated by creating a mini-library of *KpnI* fragments in pBluescriptIIKS  
374 followed by colony hybridization to give pDWCC2 and pDWCC3, respectively.  
375 Analysis of the sequence of these plasmids identified 15 genes (shown in Fig. S7). A  
376 plasmid carrying the duramycin biosynthetic genes but not the putative phage DNA  
377 was prepared by digesting pDWCC3 with *XhoI* and *HindIII* (site is in the multiple  
378 cloning site of pBluescriptIIKS) removing the 5' end of *durZ* and the putative phage  
379 DNA. This region was replaced with a *XhoI* and *HindIII* cut PCR fragment that  
380 reconstituted the portion of *durZ* removed in the previous step and introduced a *HindIII*  
381 site upstream of the *durZ* start codon. The 666 bp PCR fragment was generated using  
382 the primers BK10 (GAGCTTGACGCCGCGAAGTAGC) and Hindprim  
383 (GCGGCGAAGCTTGAGGTGGCCTCCTCCACGAAGCCA) with pDWCC3 as  
384 template and was cut with *XhoI* plus *HindIII* to give a 363 bp fragment. The resulting  
385 plasmid was then digested with *KpnI* plus *XbaI* (the *XbaI* site is in the multiple cloning  
386 site of pBluescriptIIKS) and the fragment carrying putative duramycin genes was  
387 cloned into *KpnI* plus *XbaI* cleaved pOJ436 to give pOJKH. The *KpnI* fragment from  
388 pDWCC2 was then cloned into pOJKH cut with *KpnI* to give pOJKKH which was  
389 verified by *BglII* digestion, thus restoring the original gene context.

390 **Isolation and purification of kyamicin.** *S. coelicolor* M1152/pWDW63/pEVK6 was  
391 grown in tryptic soy broth (12 x 500 mL in 2.5 L Erlenmeyer flasks) and incubated at  
392 28 °C and 200 rpm on an orbital shaker for seven days. The cells were harvested and  
393 extracted with methanol/water (1:1; 500 mL) with ultrasonication for 2 h and  
394 subsequent shaking for 16 h. After centrifugation, the supernatant was filtered and  
395 concentrated under vacuum giving 613 mg of crude material, which was then purified  
396 by semi-preparative HPLC. Chromatography was achieved over a Phenomenex  
397 Gemini-NX reversed-phase column (C18, 110 Å, 150 x 21.2 mm) using a Thermo  
398 Scientific Dionex UltiMate 3000 HPLC system. A gradient was used with mobile

399 phases of A: H<sub>2</sub>O (0.1% formic acid) and B: methanol; 0–1 min 10% B, 1–35 min 10-  
400 85% B, 35–40 min 85-100% B, 40–45 min 100% B, 45-45.1 min 100-10% B, 45.1-50  
401 min 10% B; flowrate 20 mL/min; injection volume 1000 µL. Absorbance was monitored  
402 at 215 nm and fractions (20 mL) were collected and analysed by UPLC/MS. Kyamicin  
403 was observed in fractions 22-25 which were combined and concentrated to yield an  
404 off-white solid (2.5 mg).

405 **Minimum inhibitory concentration (MIC) determination.** The spot-on-lawn method  
406 was used to determine lantibiotic MICs. A 1000 µg/mL stock solution of each lantibiotic  
407 was prepared using sterile water, along with serial dilutions from 256 – 8 µg/mL. *B.*  
408 *subtilis* EC1524 was grown and mixed with molten SNA as described above to create  
409 a lawn of bacterial growth. Once set, 5 µL of each dilution was applied directly to the  
410 agar and incubated overnight at room temperature. The MIC was defined as the lowest  
411 concentration for which a clear zone of inhibition was observed.

412 **Chemical reduction of kyamicin.** Kyamicin (1 mg) was dissolved in methanol (0.5  
413 mL) and added to an aqueous solution of NiCl<sub>2</sub> (20 mg/mL; 0.5 mL). The solution was  
414 mixed with solid NaBH<sub>4</sub> (5 mg), resulting in the generation of hydrogen gas and the  
415 formation of a black Ni<sub>2</sub>B precipitate. The tube was immediately sealed, and the  
416 mixture stirred at 55 °C. The reaction progress was monitored by UPLC-HRMS as  
417 described above, for which a peak with an *m/z* of 899.36 was observed for kyamicin  
418 ([M + 2H]<sup>2+</sup>). The successive formation of peaks with the following masses were  
419 observed: *m/z* = 884.38, 869.40 and 854.42, corresponding to the successive  
420 reduction of the three thioether bridges. After 5 h only the ion with *m/z* 854.42 could  
421 be observed, indicating that the starting material had been completely reduced. The  
422 precipitate was collected by centrifugation at 15,682 × *g* for 10 min. As the reaction  
423 supernatant contained only trace amounts of the desired product, a fresh solution of  
424 MeOH/H<sub>2</sub>O 1:1 (0.5 mL) was added to the precipitate and it was subject to  
425 ultrasonication for 30 min. Reduced kyamicin was then detected in sufficient quantity  
426 for MS/MS experiments to confirm the peptide sequence.

427 **MS analysis of reduced kyamicin.** For ESI/MS<sup>2</sup> analysis the mass of interest  
428 (854.42) was selected using an inclusion list and fragmented using data directed  
429 analysis (DDA) with the following parameters: top3 precursor selection (inclusion list  
430 only); MS2 threshold: 50,000; scan time 0.5 s without dynamic exclusion. Collision

431 energy (CE) was ramped between 15-20 at low mass (50  $m/z$ ) and 40-100 at high  
432 mass (2000  $m/z$ ). Further increase of the CE to 20-30/60-120 led to complete  
433 fragmentation.

434 For MALDI-ToF/MS the samples were mixed with  $\alpha$ -cyano-4-hydroxycinnamic acid as  
435 matrix and analysed on an Autoflex<sup>TM</sup> Speed MALDI-TOF/TOF mass spectrometer  
436 (Bruker Daltonics<sup>TM</sup> GmbH). The instrument was controlled by a flexControl<sup>TM</sup>  
437 (version 3.4, Bruker) method optimised for peptide detection and calibrated using  
438 peptide standards (Bruker). For sequence analysis fragments produced by PSD were  
439 measured using the LIFT method (Bruker). All spectra were processed in  
440 flexAnalysis<sup>TM</sup> (version 3.4, Bruker).

441 **NMR experiments.** NMR measurements were performed on a Bruker Avance III  
442 800 MHz spectrometer. Chemical shifts are reported in parts per million (ppm) relative  
443 to the solvent residual peak of DMSO- $d_6$  ( $^1\text{H}$ : 2.50 ppm, quintet;  $^{13}\text{C}$ : 39.52 ppm,  
444 septet).

445

## 446 **ACKNOWLEDGEMENTS**

447 This work was supported by the Biotechnology and Biological Sciences Research  
448 Council (BBSRC) *via* Institute Strategic Program BB/P012523/1 to the John Innes  
449 Centre (JIC); by Research Grant BB/P021506/1 to B.W.; by Research Grant  
450 208/P08242 to M.J.B; and by NPRONET Proof of Concept Award BB/L013754/1 to  
451 B.W and M.I.H. It was also supported by Research Grants NE/M015033/1 and  
452 NE/M014657/1 from the Natural Environment Research Council (NERC) to M.I.H. and  
453 B.W. E.V.K. was supported by a Norwich Research Park (NRP) studentship and the  
454 BBSRC NRP Doctoral Training Partnership grant BB/M011216/1. We acknowledge  
455 the Earlham Institute (Norwich, UK) for sequencing and assembly of the  
456 *Saccharopolyspora* sp. KY3, KY7 and KY21 genomes, which was funded by a Norwich  
457 Research Park Translational Award to B.W. and M.I.H. D.J.M.'s work on ants in Kenya  
458 is supported by the National Geographic Society, Nature Kenya and the National  
459 Commission of Science Technology and Innovation (NACOSTI Permit #  
460 MOST13/001/35C136). Dr. Juan Pablo Gomez-Escribano (JIC) is thanked for his  
461 valuable input with analysis of the *Saccharopolyspora* sp. KY3, KY7 and KY21  
462 genomes. We thank Dr Lionel Hill and Dr Gerhard Saalbach (JIC) for excellent

463 metabolomics support. Dr. Jesus Angulo and Dr Ridvan Nepravishta (UEA) are  
464 thanked for their assistance with NMR data acquisition. The authors declare no  
465 competing financial interests.

466

## 467 **FIGURE LEGENDS**

468 **FIG 1 Kyamicin peptide sequence and biosynthesis. (A)** Alignment of core  
469 peptides of kyamicin and a selection of known Type B cinnamycin-like lantibiotics, with  
470 the positions of the thioether and lysinoalanine bridges in the mature peptide shown.  
471 Conserved residues are highlighted in green, similar residues are highlighted in grey.  
472 **(B)** The kyamicin biosynthetic gene cluster, with genes colored according to predicted  
473 function. **(C)** Schematic of kyamicin biosynthesis. The thioether bridges are formed  
474 first by dehydration of Thr4, Thr11, Thr18 and Ser6 by KyaM to form dehydrobutyrine  
475 (Dhb) and dehydroalanine (Dha) residues, respectively. After thioether cyclization by  
476 KyaM, Dhb becomes S-linked Abu and Dha becomes S-linked Ala. Asp15 is  
477 hydroxylated by KyaX and the lysinoalanine bridge is then formed between Dha6 and  
478 Lys19 by KyaN. After the core peptide is fully modified, the leader peptide is  
479 proteolytically cleaved. **(D)** Structural representation of the mature kyamicin lantibiotic.

480 **FIG 2 Activation of kyamicin biosynthesis and heterologous expression.** Overlay  
481 bioassays were carried out with *B. subtilis* EC1524 and agar plugs were taken  
482 adjacent to the central streak and analysed by UPLC/MS. Extracted ion  
483 chromatograms are shown where  $m/z = 899.36$  ( $[M + 2H]^{2+}$ ). Images and LC traces  
484 are representative of at least three biological repeats. **(A)** Activation of kyamicin  
485 production in KY21 strains. The pEVK4 vector containing *kyaR1* and *kyaL* results in a  
486 zone of inhibition, corresponding to the production of kyamicin, in contrast to the pGP9  
487 empty vector control or the wildtype strain. **(B)** Heterologous expression of kyamicin  
488 in *S. coelicolor* M1152. A zone of inhibition, corresponding to kyamicin production, is  
489 observed only when the pWDW63 carrying the *kya* biosynthetic genes is expressed in  
490 combination with pEVK6 carrying *kyaR1* and *kyaL*.

491 **FIG 3 Characterisation of kyamicin.** The connectivity of the peptide was confirmed  
492 by chemical reduction followed by tandem MS fragmentation. Reduction with  $\text{NaBH}_4$ -  
493  $\text{NiCl}_2$  resulted in the cleavage of the methyllanthionine bridges (blue), corresponding



494 to the loss of three S atoms and gain of six H atoms, with a mass shift from  $[M + 2H]^{2+}$   
495 = 899.36  $m/z$  to 854.42  $m/z$ . Tandem MS using the MALDI-ToF LIFT method allowed  
496 identification of the  $y$  ion ( $NH_3^+$ ) series for the complete peptide (Figure S5).  
497 Fragmentation of the lysinoalanine bridge (pink) occurred via rearrangement to give  
498  $N=CH_2$  at the terminus of the lysine sidechain and a glycine residue at position 6.

499 **FIG 4 Comparative bioassay of kyamicin, duramycin and cinnamycin against *B.***  
500 ***subtilis* EC1524.** The MIC of each substance was determined by direct application of  
501 serial dilutions of the compounds in water, on a SNA agar plate inoculated with *B.*  
502 *subtilis* EC1524. NC = H<sub>2</sub>O is the negative control. Kyamicin displays an MIC of 128  
503  $\mu\text{g/mL}$ , whereas duramycin inhibits at 32  $\mu\text{g/mL}$  and cinnamycin at 16  $\mu\text{g/mL}$ .

504 **FIG 5 Activation of duramycin biosynthesis.** Overlay bioassays were carried out  
505 with *B. subtilis* EC1524 and agar plugs were taken adjacent to the central streak and  
506 analysed by UPLC/MS. Extracted ion chromatograms are shown where  $m/z = 1006.93$   
507 ( $[M+2H]^{2+}$ ). Duramycin was only detected in the strain carrying both pOJKHH and  
508 pEVK6. The duramycin peak aligns with an authentic standard of duramycin (1 mg/mL  
509 in 5% formic acid), shown on a separate scale. Images and LC traces are  
510 representative of at least three biological repeats.

511

## 512 TABLES

513 **TABLE 1 Proteins encoded by the cinnamycin and kyamicin BGCs.**

514 **TABLE 2 Calculated and observed  $m/z$  values for lantibiotic compounds in this**  
515 **study.**

516

## 517 SUPPLEMENTAL MATERIAL

518 **FIG S1 Alignment of *Saccharopolyspora* sp. KY3, KY7 and KY21 16S rDNA**  
519 **sequences.** The alignment was performed with Clustal Omega (v1.2.4) and the figure  
520 was generated by SnapGene Viewer (v4.2.11). The difference between KY21 to  
521 strains KY3 and KY7 is indicated with a black arrow and a box at position 685.

522 **FIG S2 Schematic of synthetic artificial operons. (A)** The operon consisting of  
523 *kyaR1*, encoding a *Streptomyces* antibiotic regulatory protein (SARP), and *kyaL*,  
524 encoding a PE-methyl transferase that provides resistance – the homologues of *cinR1*  
525 and *cinorf10* respectively. **(B)** The operon carrying genes *kyaN* to *kyaH* as an  
526 *EcoRI/XbaI* fragment. These genes are expected to be essential for kyamicin  
527 biosynthesis.

528 **FIG S3 Activation of kyamicin biosynthesis in KY3 and KY7.** The pEVK4 vector  
529 containing *kyaR1* and *kyaL* results in a zone of inhibition, corresponding to the  
530 production of kyamicin, in contrast to the pGP9 empty vector control or the wildtype  
531 strain. **(A)** Activation of kyamicin production in KY3, and **(B)** in KY7.

532 **FIG S4 Dissection of the contribution of *kyaR1* and *kyaL* to kyamicin BGC**  
533 **activation.** Overlay bioassays were carried out with *B. subtilis* EC1524 and agar plugs  
534 were taken adjacent to the central streak and analysed by UPLC/MS. Expression of  
535 *kyaL* (pEVK12) does not result in a zone of inhibition. Expression of *kyaR1* (pEVK1)  
536 results in a zone of inhibition, corresponding to the production of deoxykyamicin only.  
537 Co-expression of *kyaR1* and *kyaL* (pEVK6) results in a zone of inhibition,  
538 corresponding to the production of both kyamicin and deoxykyamicin. Images and LC  
539 traces are representative of at least three biological repeats. **(A)** Extracted ion  
540 chromatograms are shown where  $m/z = 899.36$  ( $[M+2H]^{2+}$ ). **(B)** Extracted ion  
541 chromatograms are shown where  $m/z = 891.36$  ( $[M+2H]^{2+}$ ).

542 **FIG S5 Kyamicin fragmentation.** Following reduction to remove methyllanthionine  
543 bridges, kyamicin was subject to MALDI-ToF tandem MS, giving the complete  $y$  ion  
544 ( $NH_3^+$ ) series. **(A)** Structure of reduced kyamicin and the  $y_1 - y_{18}$  ion series. **(B)** MALDI-  
545 ToF tandem MS spectrum with the  $y$  ion series indicated with dashed red lines.

546 **FIG S6 Kyamicin NMR Spectra. (A)**  $^1H$  NMR spectrum. **(B)** TOCSY spectrum. **(C)**  
547 NOESY spectrum. **(D)** HSQC spectrum.

548 **FIG S7 Schematic of duramycin BGC and plasmids used to construct pOJKKH**  
549 **and SARP binding sites of kyamicin, cinnamycin and duramycin. (A)** The *S.*  
550 *cinnamoneus* DNA sequences represented on the plasmids pDWCC2 and pDWCC3  
551 are present in the published genome sequence as 81593-99144 bp of contig  
552 NZ\_MOEP01000024.1. pDWCC2 consists of the area from the left side *KpnI* site (from

553 *durorf1*) to the central side *KpnI* site in *durX*. pDWCC3 consists of the area covering  
554 from the central *KpnI* site in *durX* to the right side *KpnI* site after a putative integrase  
555 encoding gene. The putative duramycin resistance/regulatory genes are represented  
556 in the published genome sequence by 54637-59121 bp of contig  
557 NZ\_MOEP01000113.1. **(B)** Sequence alignment of putative SARP binding sites of  
558 kyamicin, cinnamycin and duramycin. Conserved residues within all three sequences  
559 are marked with asterisks and the 5 bp SARP binding motifs are in bold. The alignment  
560 was performed with Clustal Omega (v1.2.4).

561

562 **TABLE S1 Strains and plasmids used in this work.**

563 **TABLE S2 Recipes for liquid screening media.** Quantities of components are given  
564 in g/L. SM = screening media.

565 **TABLE S3 Putative NMR assignments.** ND = not determined.

566

## 567 REFERENCES

- 568 1. O'Neill J, Davies S, Rex J, White L, Murray R. 2016. Review on antimicrobial  
569 resistance, tackling drug-resistant infections globally: final report and  
570 recommendations. London: Wellcome Trust and UK Government.
- 571 2. Tacconelli E, Carrara E, Savoldi A, Harbarth S, Mendelson M, Monnet DL,  
572 Pulcini C, Kahlmeter G, Kluytmans J, Carmeli Y, Ouellette M, Outtersson K,  
573 Patel J, Cavalieri M, Cox EM, Houchens CR, Grayson ML, Hansen P, Singh N,  
574 Theuretzbacher U, Magrini N, Aboderin AO, Al-Abri SS, Awang Jalil N,  
575 Benzonana N, Bhattacharya S, Brink AJ, Burkert FR, Cars O, Cornaglia G, Dyar  
576 OJ, Friedrich AW, Gales AC, Gandra S, Giske CG, Goff DA, Goossens H,  
577 Gottlieb T, Guzman Blanco M, Hryniewicz W, Kattula D, Jinks T, Kanj SS, Kerr  
578 L, Kieny M-P, Kim YS, Kozlov RS, Labarca J, Laxminarayan R, Leder K, et al.  
579 2018. Discovery, research, and development of new antibiotics: the WHO  
580 priority list of antibiotic-resistant bacteria and tuberculosis. *Lancet Infect Dis*  
581 18:318-327.
- 582 3. Talkington K, Shore C, Kothari P. 2016. A scientific roadmap for antibiotic  
583 discovery. The Pew Charitable Trust: Philadelphia, PA, USA.

- 584 4. Doroghazi JR, Albright JC, Goering AW, Ju KS, Haines RR, Tchalukov KA,  
585 Labeda DP, Kelleher NL, Metcalf WW. 2014. A roadmap for natural product  
586 discovery based on large-scale genomics and metabolomics. *Nat Chem Biol*  
587 10:963-8.
- 588 5. Kämpfer P, Glaeser SP, Parkes L, van Keulen G, Dyson P. 2014. The Family  
589 *Streptomycetaceae*. *The Prokaryotes: Actinobacteria*:889-1010.
- 590 6. Nouioui I, Carro L, García-López M, Meier-Kolthoff JP, Woyke T, Kyrpides NC,  
591 Pukall R, Klenk H-P, Goodfellow M, Göker M. 2018. Genome-Based  
592 Taxonomic Classification of the Phylum *Actinobacteria*. *Front Microbiol* 9.
- 593 7. Rutledge PJ, Challis GL. 2015. Discovery of microbial natural products by  
594 activation of silent biosynthetic gene clusters. *Nat Rev Microbiol* 13:509.
- 595 8. van der Meij A, Worsley SF, Hutchings MI, van Wezel GP. 2017. Chemical  
596 ecology of antibiotic production by actinomycetes. *FEMS Microbiol Rev* 41:392-  
597 416.
- 598 9. Adnani N, Rajski SR, Bugni TS. 2017. Symbiosis-inspired approaches to  
599 antibiotic discovery. *Nat Prod Rep* 34:784-814.
- 600 10. Van Arnam EB, Currie CR, Clardy J. 2018. Defense contracts: molecular  
601 protection in insect-microbe symbioses. *Chem Soc Rev* 47:1638-1651.
- 602 11. Molloy EM, Hertweck C. 2017. Antimicrobial discovery inspired by ecological  
603 interactions. *Curr Opin Microbiol* 39:121-127.
- 604 12. Qin Z, Munnoch JT, Devine R, Holmes NA, Seipke RF, Wilkinson KA, Wilkinson  
605 B, Hutchings MI. 2017. Formicamycins, antibacterial polyketides produced by  
606 *Streptomyces formicae* isolated from African *Tetraponera* plant-ants. *Chem Sci*  
607 8:3218-3227.
- 608 13. Seipke RF, Barke J, Heavens D, Yu DW, Hutchings MI. 2013. Analysis of the  
609 bacterial communities associated with two ant-plant symbioses.  
610 *Microbiologyopen* 2:276-83.
- 611 14. Young TP, Stubblefield CH, Isbell LA. 1996. Ants on swollen-thorn acacias:  
612 species coexistence in a simple system. *Oecologia* 109:98-107.
- 613 15. Riginos C, Karande MA, Rubenstein DI, Palmer TM. 2015. Disruption of a  
614 protective ant-plant mutualism by an invasive ant increases elephant damage  
615 to savanna trees. *Ecology* 96:654-61.

- 616 16. Blatrix R, Djieto-Lordon C, Mondolot L, La Fisca P, Voglmayr H, McKey D.  
617 2012. Plant-ants use symbiotic fungi as a food source: new insight into the  
618 nutritional ecology of ant-plant interactions. *Proc Biol Sci* 279:3940-7.
- 619 17. Baker CC, Martins DJ, Pelaez JN, Billen JP, Pringle A, Frederickson ME, Pierce  
620 NE. 2017. Distinctive fungal communities in an obligate African ant-plant  
621 mutualism. *Proc Biol Sci* 284.
- 622 18. Currie CR. 2001. A Community of Ants, Fungi, and Bacteria: A Multilateral  
623 Approach to Studying Symbiosis. *Annu Rev Microbiol* 55:357-380.
- 624 19. Andersen SB, Hansen LH, Sapountzis P, Sørensen SJ, Boomsma JJ. 2013.  
625 Specificity and stability of the *Acromyrmex*–*Pseudonocardia* symbiosis.  
626 *Molecular Ecology* 22:4307-4321.
- 627 20. Barke J, Seipke RF, Gruschow S, Heavens D, Drou N, Bibb MJ, Goss RJ, Yu  
628 DW, Hutchings MI. 2010. A mixed community of actinomycetes produce  
629 multiple antibiotics for the fungus farming ant *Acromyrmex octospinosus*. *BMC*  
630 *Biol* 8:109.
- 631 21. Cafaro MJ, Poulsen M, Little AE, Price SL, Gerardo NM, Wong B, Stuart AE,  
632 Larget B, Abbot P, Currie CR. 2011. Specificity in the symbiotic association  
633 between fungus-growing ants and protective *Pseudonocardia* bacteria. *Proc*  
634 *Biol Sci* 278:1814-22.
- 635 22. Heine D, Holmes NA, Worsley SF, Santos ACA, Innocent TM, Scherlach K,  
636 Patrick EH, Douglas WY, Murrell JC, Vieria PC. 2018. Chemical warfare  
637 between leafcutter ant symbionts and a co-evolved pathogen. *Nat Commun*  
638 9:2208.
- 639 23. Benedict RG, Dvonch W, Shotwell OL, Pridham TG, Lindenfelser LA. 1952.  
640 Cinnamycin, an antibiotic from *Streptomyces cinnamoneus* nov. sp. *Antibiot*  
641 *Chemother* 2:591-4.
- 642 24. Widdick D, Dodd H, Barraille P, White J, Stein T, Chater K, Gasson M, Bibb M.  
643 2003. Cloning and engineering of the cinnamycin biosynthetic gene cluster from  
644 *Streptomyces cinnamoneus cinnamoneus* DSM 40005. *Proc Natl Acad Sci U*  
645 *S A* 100:4316-4321.
- 646 25. Iwamoto K, Hayakawa T, Murate M, Makino A, Ito K, Fujisawa T, Kobayashi T.  
647 2007. Curvature-dependent recognition of ethanolamine phospholipids by  
648 duramycin and cinnamycin. *Biophys J* 93:1608-1619.

- 649 26. Arnison PG, Bibb MJ, Bierbaum G, Bowers AA, Bugni TS, Bulaj G, Camarero  
650 JA, Campopiano DJ, Challis GL, Clardy J, Cotter PD, Craik DJ, Dawson M,  
651 Dittmann E, Donadio S, Dorrestein PC, Entian KD, Fischbach MA, Garavelli JS,  
652 Goransson U, Gruber CW, Haft DH, Hemscheidt TK, Hertweck C, Hill C,  
653 Horwill AR, Jaspars M, Kelly WL, Klinman JP, Kuipers OP, Link AJ, Liu W,  
654 Marahiel MA, Mitchell DA, Moll GN, Moore BS, Muller R, Nair SK, Nes IF, Norris  
655 GE, Olivera BM, Onaka H, Patchett ML, Piel J, Reaney MJ, Rebuffat S, Ross  
656 RP, Sahl HG, Schmidt EW, Selsted ME, et al. 2013. Ribosomally synthesized  
657 and post-translationally modified peptide natural products: overview and  
658 recommendations for a universal nomenclature. *Nat Prod Rep* 30:108-60.
- 659 27. Chatterjee C, Paul M, Xie L, van der Donk WA. 2005. Biosynthesis and Mode  
660 of Action of Lantibiotics. *Chem Rev* 105:633-684.
- 661 28. Kodani S, Komaki H, Ishimura S, Hemmi H, Ohnishi-Kameyama M. 2016.  
662 Isolation and structure determination of a new lantibiotic cinnamycin B from  
663 *Actinomadura atramentaria* based on genome mining. *J Ind Microbiol*  
664 *Biotechnol* 43:1159-65.
- 665 29. Shotwell OL, Stodola FH, Michael WR, Lindenfelser LA, Dworschack RG,  
666 Pridham TG. 1958. Antibiotics against plant disease. III. Duramycin, a new  
667 antibiotic from *Streptomyces cinnamomeus* forma *azacoluta*. *J Am Chem Soc*  
668 80:3912-3915.
- 669 30. Marki F, Hanni E, Fredenhagen A, van Oostrum J. 1991. Mode of action of the  
670 lanthionine-containing peptide antibiotics duramycin, duramycin B and C, and  
671 cinnamycin as indirect inhibitors of phospholipase A2. *Biochem Pharmacol*  
672 42:2027-35.
- 673 31. Chen E, Chen Q, Chen S, Xu B, Ju J, Wang H. 2017. Mathermycin, a Lantibiotic  
674 from the Marine Actinomycete *Marinactinospora thermotolerans* *Appl Environ*  
675 *Microbiol* 83.
- 676 32. Ökesli A, Cooper LE, Fogle EJ, van der Donk WA. 2011. Nine Post-translational  
677 Modifications during the Biosynthesis of Cinnamycin. *J Am Chem Soc*  
678 133:13753-13760.
- 679 33. Huo L, Okesli A, Zhao M, van der Donk WA. 2017. Insights into the Biosynthesis  
680 of Duramycin. *Appl Environ Microbiol* 83.
- 681 34. Xie L, van der Donk WA. 2004. Post-translational modifications during  
682 lantibiotic biosynthesis. *Curr Opin Chem Biol* 8:498-507.

- 683 35. Oliynyk I, Varelogianni G, Roomans GM, Johannesson M. 2010. Effect of  
684 duramycin on chloride transport and intracellular calcium concentration in cystic  
685 fibrosis and non-cystic fibrosis epithelia. *Apmis* 118:982-990.
- 686 36. Holmes NA, Devine R, Qin Z, Seipke RF, Wilkinson B, Hutchings MI. 2018.  
687 Complete genome sequence of *Streptomyces formicae* KY5, the formicamycin  
688 producer. *J Biotechnol* 265:116-118.
- 689 37. Blin K, Wolf T, Chevrette MG, Lu X, Schwalen CJ, Kautsar SA, Suarez Duran  
690 HG, De Los Santos EL, Kim HU, Nave M. 2017. antiSMASH 4.0—  
691 improvements in chemistry prediction and gene cluster boundary identification.  
692 *Nucleic Acids Res* 45:W36-W41.
- 693 38. O'Rourke S, Widdick D, Bibb M. 2017. A novel mechanism of immunity controls  
694 the onset of cinnamycin biosynthesis in *Streptomyces cinnamoneus* DSM  
695 40646. *J Ind Microbiol Biotechnol* 44:563-572.
- 696 39. Andexer JN, Kendrew SG, Nur-e-Alam M, Lazos O, Foster TA, Zimmermann  
697 A-S, Warneck TD, Suthar D, Coates NJ, Koehn FE, Skotnicki JS, Carter GT,  
698 Gregory MA, Martin CJ, Moss SJ, Leadlay PF, Wilkinson B. 2011. Biosynthesis  
699 of the immunosuppressants FK506, FK520, and rapamycin involves a  
700 previously undescribed family of enzymes acting on chorismate. *Proc Natl Acad*  
701 *Sci U S A* 108:4776-4781.
- 702 40. Gomez-Escribano JP, Bibb MJ. 2011. Engineering *Streptomyces coelicolor* for  
703 heterologous expression of secondary metabolite gene clusters. *Microbial*  
704 *Biotechnology* 4:207-215.
- 705 41. Hong H-J, Hutchings MI, Hill LM, Buttner MJ. 2005. The role of the novel Fem  
706 protein VanK in vancomycin resistance in *Streptomyces coelicolor*. *J Biol Chem*  
707 280:13055-13061.
- 708 42. Bierman M, Logan R, O'Brien K, Seno E, Rao RN, Schoner B. 1992. Plasmid  
709 cloning vectors for the conjugal transfer of DNA from *Escherichia coli* to  
710 *Streptomyces* spp. *Gene* 116:43-49.
- 711 43. Lopatniuk M, Myronovskyi M, Luzhetskyy A. 2017. *Streptomyces albus*: A New  
712 Cell Factory for Non-Canonical Amino Acids Incorporation into Ribosomally  
713 Synthesized Natural Products. *ACS Chem Biol* 12:2362-2370.
- 714 44. Kieser T, Foundation JI, Bibb MJ, Buttner MJ, Chater KF, Hopwood DA. 2000.  
715 *Practical Streptomyces Genetics*. John Innes Foundation.

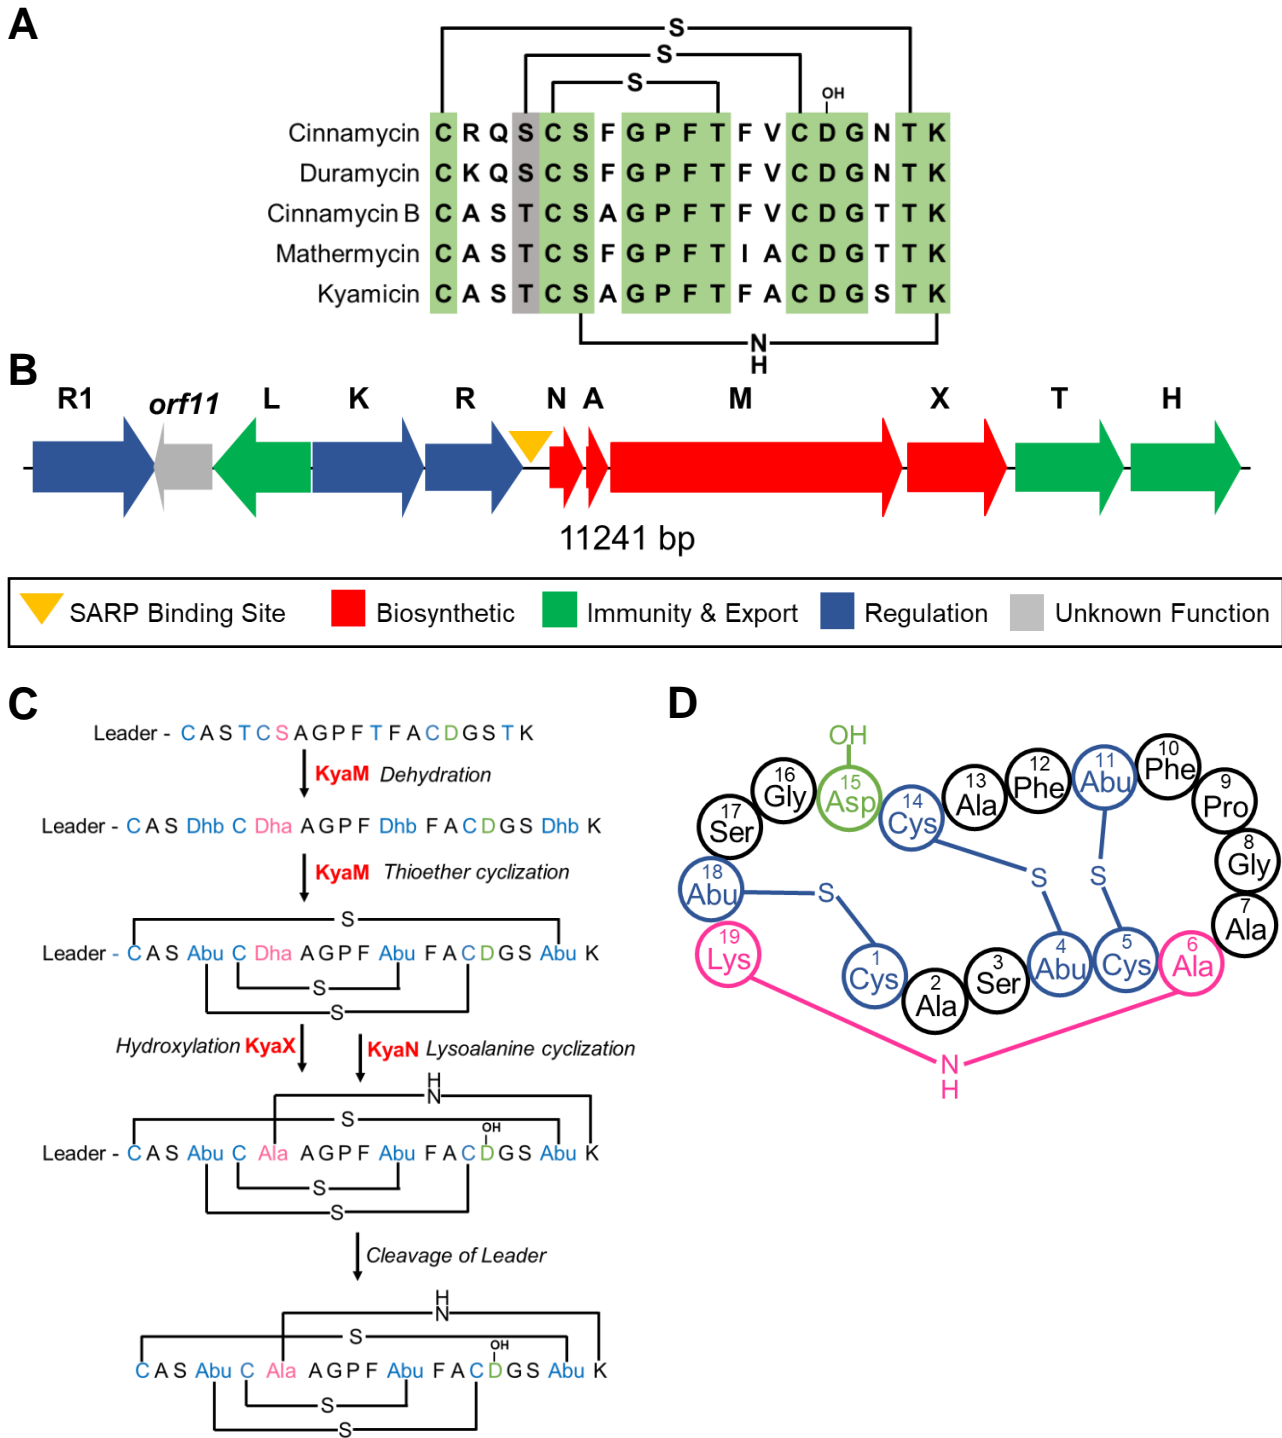

**FIG 1 Kyamycin peptide sequence and biosynthesis. (A)** Alignment of core peptides of kyamycin and a selection of known Type B cinnamycin-like lantibiotics, with the positions of the thioether and lysinoalanine bridges in the mature peptide shown. Conserved residues are highlighted in green, similar residues are highlighted in grey. **(B)** The kyamycin biosynthetic gene cluster, with genes colored according to predicted function. **(C)** Schematic of kyamycin biosynthesis. The thioether bridges are formed first by dehydration of Thr4, Thr11, Thr18 and Ser6 by *KyaM* to form dehydrobutyryne (Dhb) and dehydroalanine (Dha) residues, respectively. After thioether cyclization by *KyaM*, Dhb becomes S-linked Abu and Dha becomes S-linked Ala. Asp15 is hydroxylated by *KyaX* and the lysinoalanine bridge is then formed between Dha6 and Lys19 by *KyaN*. After the core peptide is fully modified, the leader peptide is proteolytically cleaved. **(D)** Structural representation of the mature kyamycin lantibiotic.



**A**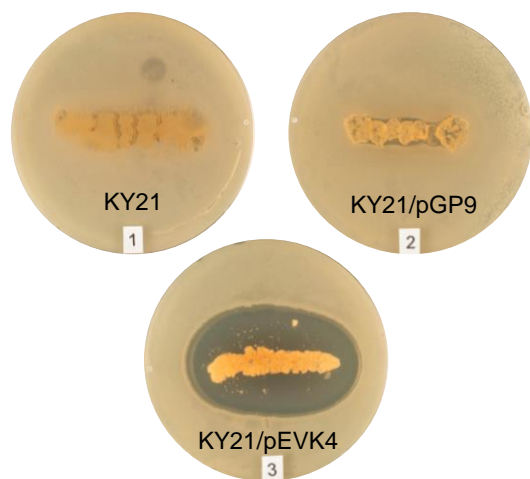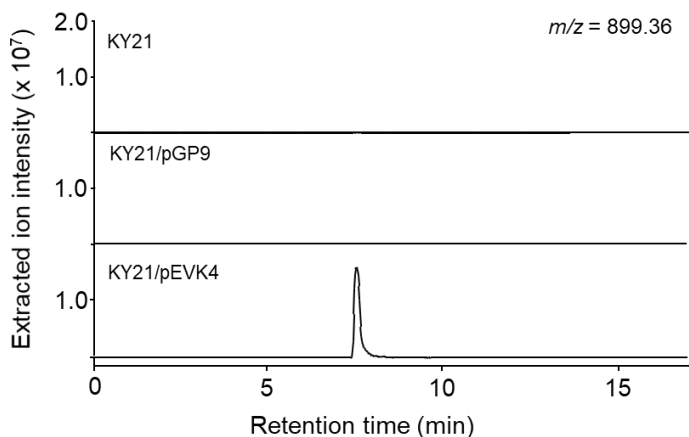**B**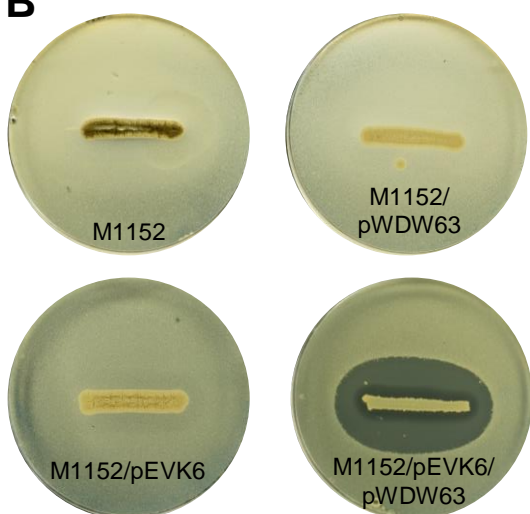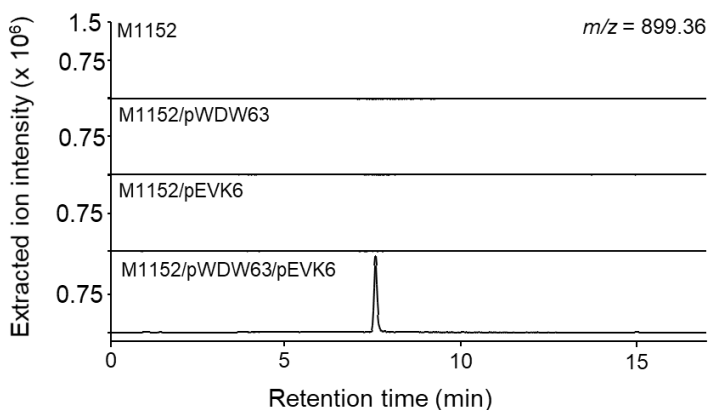

**FIG 2 Activation of kyamycin biosynthesis and heterologous expression.** Overlay bioassays were carried out with *B. subtilis* EC1524 and agar plugs were taken adjacent to the central streak and analysed by UPLC/MS. Extracted ion chromatograms are shown where  $m/z = 899.36$  ( $[M + 2H]^{2+}$ ). Images and LC traces are representative of at least three biological repeats. **(A)** Activation of kyamycin production in KY21 strains. The pEVK4 vector containing *kyaR1* and *kyaL* results in a zone of inhibition, corresponding to the production of kyamycin, in contrast to the pGP9 empty vector control or the wildtype strain. **(B)** Heterologous expression of kyamycin in *S. coelicolor* M1152. A zone of inhibition, corresponding to kyamycin production, is observed only when the pWDW63 carrying the *kya* biosynthetic genes is expressed in combination with pEVK6 carrying *kyaR1* and *kyaL*.

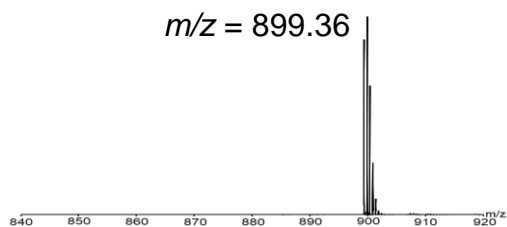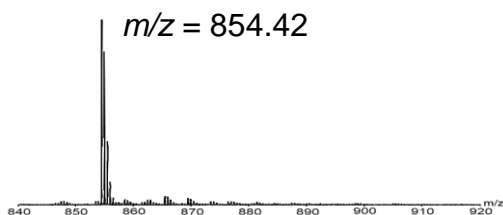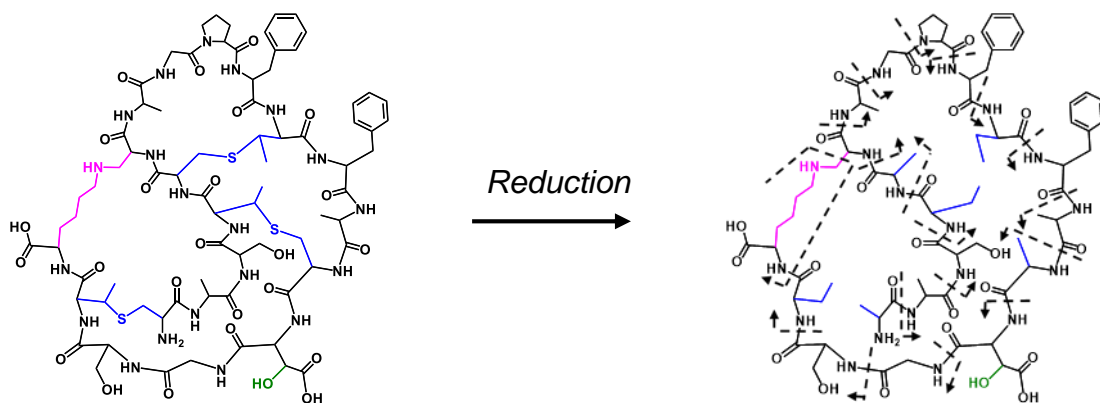

**FIG 3 Characterisation of kyamicin.** The connectivity of the peptide was confirmed by chemical reduction followed by tandem MS fragmentation. Reduction with  $\text{NaBH}_4\text{-NiCl}_2$  resulted in the cleavage of the methyllanthionine bridges (blue), corresponding to the loss of three S atoms and gain of six H atoms, with a mass shift from  $[\text{M} + 2\text{H}]^{2+} = 899.36$   $m/z$  to  $854.42$   $m/z$ . Tandem MS using the MALDI-ToF LIFT method allowed identification of the  $\gamma$  ion ( $\text{NH}_3^+$ ) series for the complete peptide (Figure S5). Fragmentation of the lysinoalanine bridge (pink) occurred via rearrangement to give  $\text{N}=\text{CH}_2$  at the terminus of the lysine sidechain and a glycine residue at position 6.

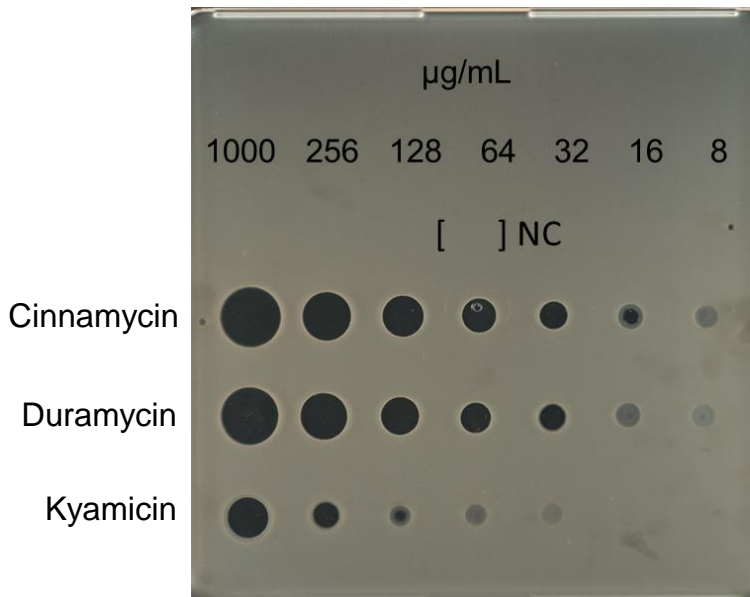

**FIG 4 Comparative bioassay of kyamicin, duramycin and cinnamycin against *B. subtilis* EC1524.** The MIC of each substance was determined by direct application of serial dilutions of the compounds in water on a SNA plate inoculated with *B. subtilis* EC1524. NC = H<sub>2</sub>O as the negative control. The MIC of kyamicin is 128 µg/mL, whereas duramycin inhibits at 32 µg/mL and cinnamycin at 16 µg/mL.

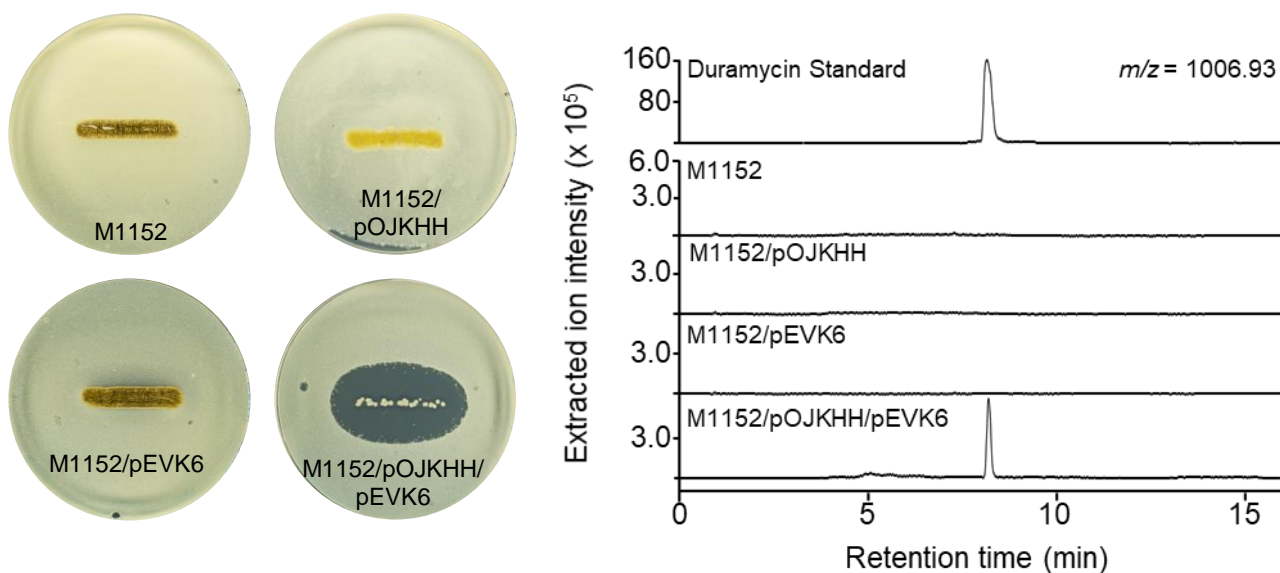

**FIG 5 Activation of duramycin biosynthesis.** Overlay bioassays were carried out with *B. subtilis* EC1524 and agar plugs were taken adjacent to the central streak and analysed by UPLC/MS. Extracted ion chromatograms are shown where  $m/z = 1006.93$  ( $[M + 2H]^{2+}$ ). Duramycin was only detected in the strain carrying both pOJKHH and pEVK6. The duramycin peak aligns with an authentic standard of duramycin (1 mg/mL in 5% formic acid), shown on a separate scale. Images and LC traces are representative of at least three biological repeats.

**TABLE 1. Proteins encoded by the kyamicin, cinnamycin and duramycin BGCs.**

| <b>Kyamicin</b>         | <b>Cinnamycin</b> | <b>Duramycin</b> | <b>Proposed function</b>          |
|-------------------------|-------------------|------------------|-----------------------------------|
| <b>KyaN (123aa)</b>     | CinN (119aa)      | DurN (119aa)     | Formation of lysinoalanine bridge |
| <b>KyaA (78aa)</b>      | CinA (78aa)       | DurA (77aa)      | Precursor peptide                 |
| <b>KyaM (1065aa)</b>    | CinM (1088aa)     | DurM (1083aa)    | Formation of lanthionine residues |
| <b>KyaX (302aa)</b>     | CinX (325aa)      | DurX (327aa)     | Hydroxylation of Asp15            |
| <b>KyaT (327aa)</b>     | CinT (309aa)      | DurT (352aa)     | Export                            |
| <b>KyaH (294aa)</b>     | CinH (290aa)      | DurH (290aa)     | Export                            |
| <b>Not Present</b>      | CinY              | DurY             | Not essential                     |
| <b>Not present</b>      | CinZ              | DurZ             | Not essential                     |
| <b>Not present</b>      | Cinorf8           | Durorf8          | Not essential                     |
| <b>Not present</b>      | Cinorf9           | Not present      | Not essential                     |
| <b>KyaR (216aa)</b>     | CinR (216aa)      | DurR (216aa)     | Regulation                        |
| <b>KyaK (372aa)</b>     | CinK (354aa)      | DurK (349aa)     | Regulation                        |
| <b>KyaL (226aa)</b>     | CinL (236aa)      | DurL (235aa)     | Immunity                          |
| <b>Kyaorf11 (295aa)</b> | Cinorf11 (396aa)  | Durorf11 (396aa) | Not essential                     |
| <b>KyaR1 (260aa)</b>    | CinR1 (261aa)     | DurR1 (261aa)    | Regulation                        |

**TABLE 2. Calculated and observed  $m/z$  values for lantibiotic compounds in this study**

| Compound                      | Formula                                                                         | Calculated<br>[M + 2H] <sup>2+</sup> $m/z$ | Observed<br>[M + 2H] <sup>2+</sup> $m/z$ | Error (ppm) |
|-------------------------------|---------------------------------------------------------------------------------|--------------------------------------------|------------------------------------------|-------------|
| Kyamycin                      | C <sub>76</sub> H <sub>108</sub> N <sub>20</sub> O <sub>25</sub> S <sub>3</sub> | 899.3551                                   | 899.3553                                 | 0.22        |
| Deoxykyamycin                 | C <sub>76</sub> H <sub>108</sub> N <sub>20</sub> O <sub>24</sub> S <sub>3</sub> | 891.3576                                   | 891.3557                                 | -2.13       |
| Partially Reduced<br>Kyamycin | C <sub>76</sub> H <sub>110</sub> N <sub>20</sub> O <sub>25</sub> S <sub>2</sub> | 884.3768                                   | 884.3767                                 | -0.11       |
| Partially Reduced<br>Kyamycin | C <sub>76</sub> H <sub>112</sub> N <sub>20</sub> O <sub>25</sub> S              | 869.3987                                   | 869.3990                                 | 0.35        |
| Reduced Kyamycin              | C <sub>76</sub> H <sub>114</sub> N <sub>20</sub> O <sub>25</sub>                | 854.4204                                   | 854.4202                                 | -0.23       |
| Duramycin                     | C <sub>89</sub> H <sub>125</sub> N <sub>23</sub> O <sub>25</sub> S <sub>3</sub> | 1006.9262                                  | 1006.9232                                | -2.98       |
| Deoxyduramycin                | C <sub>89</sub> H <sub>125</sub> N <sub>23</sub> O <sub>24</sub> S <sub>3</sub> | 998.9287                                   | 998.9253                                 | -3.40       |
